# Supplementary material for: Unravelling the Links between Phage Adsorption and Successful Infection in Clostridium difficile
Source: MDPI journal article supplement (doi:10.3390/v10080411), 2018-08-06
Supplement: s1 [file s1]

## Supplementary materials

**Supplementary Table S1.** A list of *C. difficile* phages used for phylogenetic analyses of their tail fibres and their accession numbers.

| <i>C. difficile</i> Phage | Taxonomy   | Tail fiber protein accession number |
|---------------------------|------------|-------------------------------------|
| CDKM15                    | Myoviridae | ANT45172.1                          |
| CDKM9                     | Myoviridae | ANT45092.1                          |
| CDHM1                     | Myoviridae | YP_009032171.1                      |
| CDHM3                     | Myoviridae | MH256665                            |
| CDHM6                     | Myoviridae | MH256666                            |
| phiC2                     | Myoviridae | YP_001110744.1                      |
| CD27                      | Myoviridae | YP_002290901.1                      |
| phiCD481-1                | Myoviridae | CEK40592.1                          |
| phiCD505                  | Myoviridae | CEK40649.1                          |
| phiCD506                  | Myoviridae | CEK40722.1                          |
| phiCDHM11                 | Myoviridae | CDL68837.1                          |
| phiCDHM13                 | Myoviridae | CDL65303.1                          |
| phiCDHM14                 | Myoviridae | CDU85306.1                          |
| phiCDHM19                 | Myoviridae | CDW17212.1                          |
| phiMMP01                  | Myoviridae | CEK40783.1                          |
| phiMMP02                  | Myoviridae | YP_006990503.1                      |
| phiMMP03                  | Myoviridae | CEK40864.1                          |
| phiMMP04                  | Myoviridae | YP_006990576.1                      |

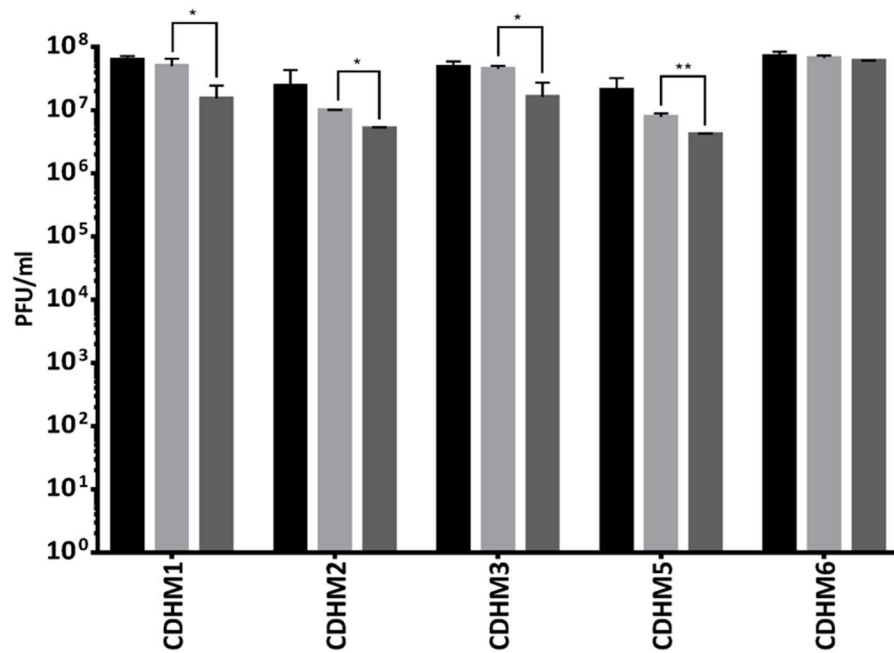

**Supplementary Figure S1.** The effect of salts on *C. difficile* phage adsorption. Adsorption assays of phages CDHM1, CDHM2, CDHM3, CDHM5 and CDHM6 were conducted to their propagation host CD105HE1 either in the absence of salts (light grey bars) or in presence of salts (dark grey) and compared to the original phage titre (black bars). Plotted are titres of free phage particles calculated from average titres from three independent repeats each with three technical replicates and error bars represent standard error of the mean. Statistically significant differences between free phage titres when no salts versus salts are added have been highlighted ( $p \leq 0.05$  (\*) and  $P \leq 0.01$  (\*\*)).

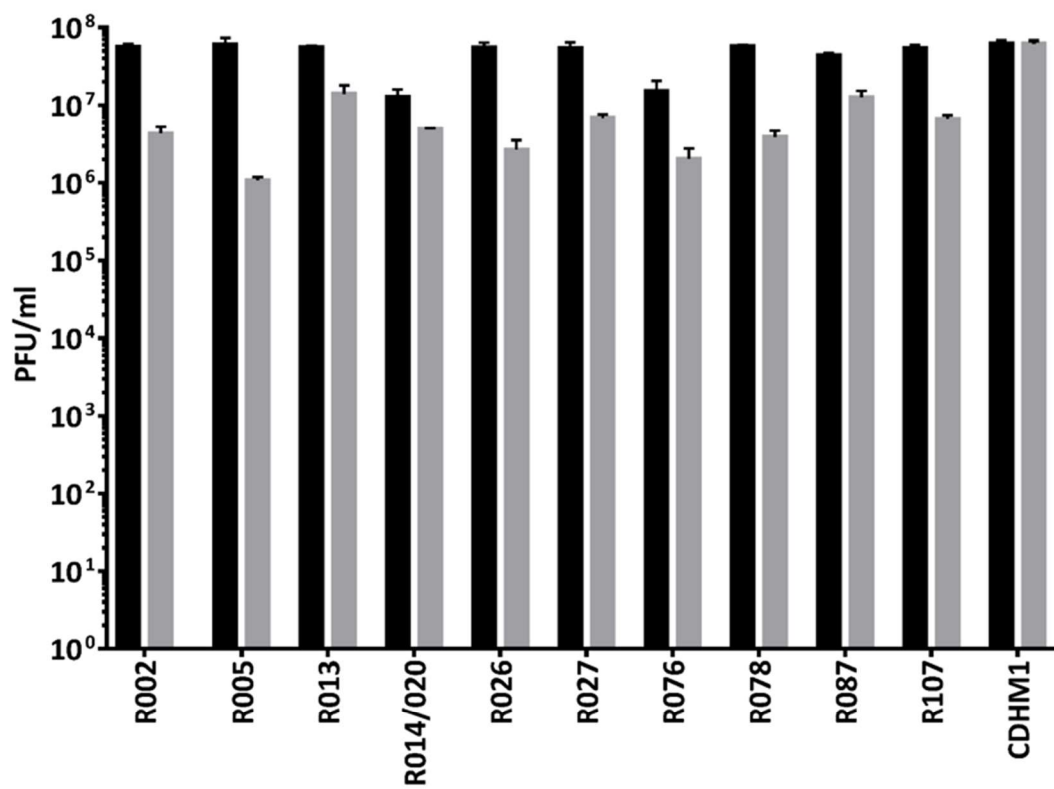

(a)

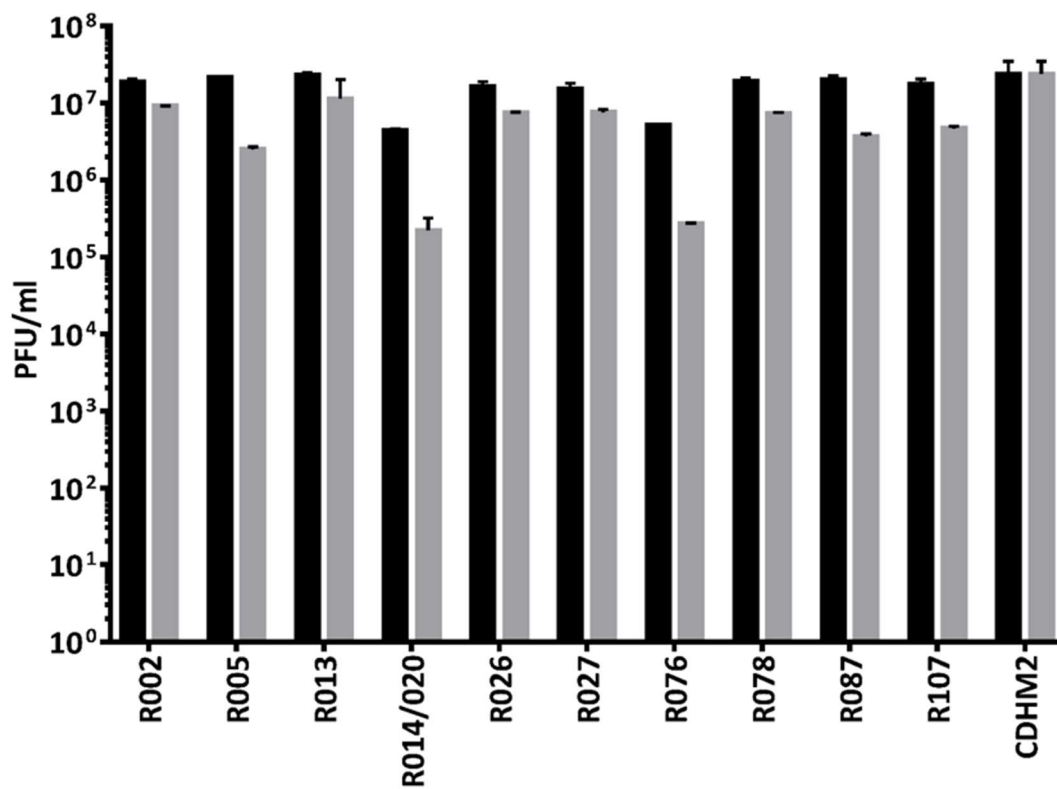

(b)

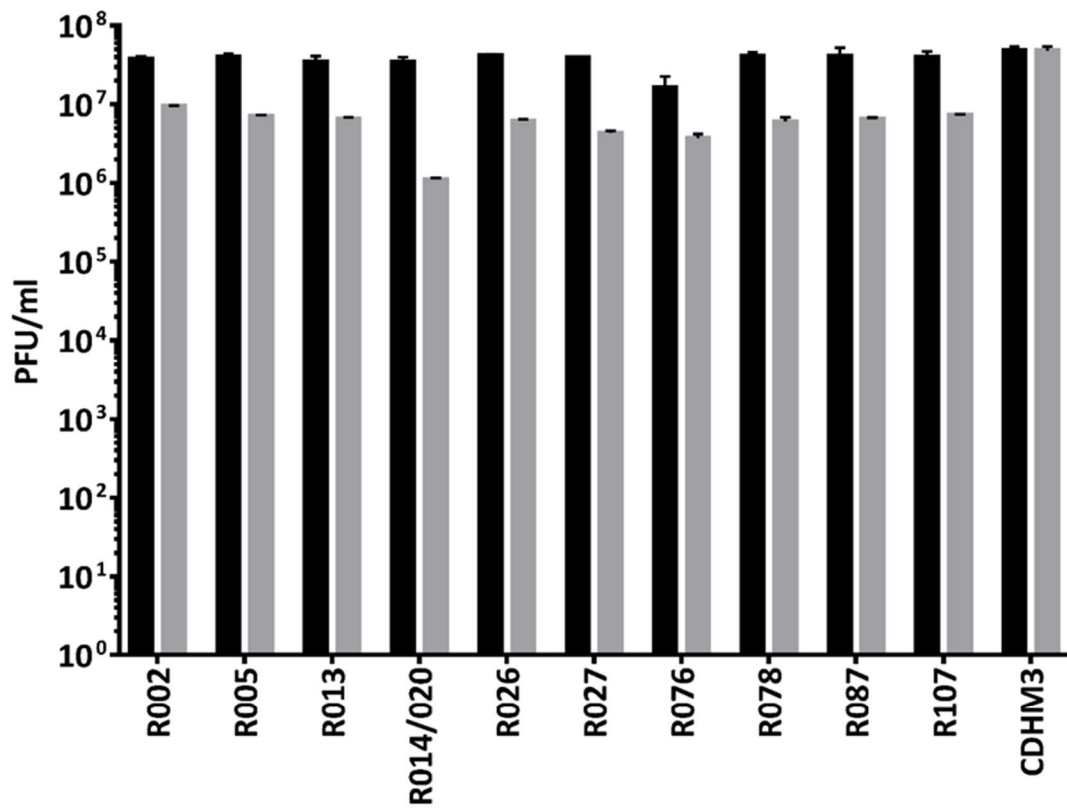

(c)

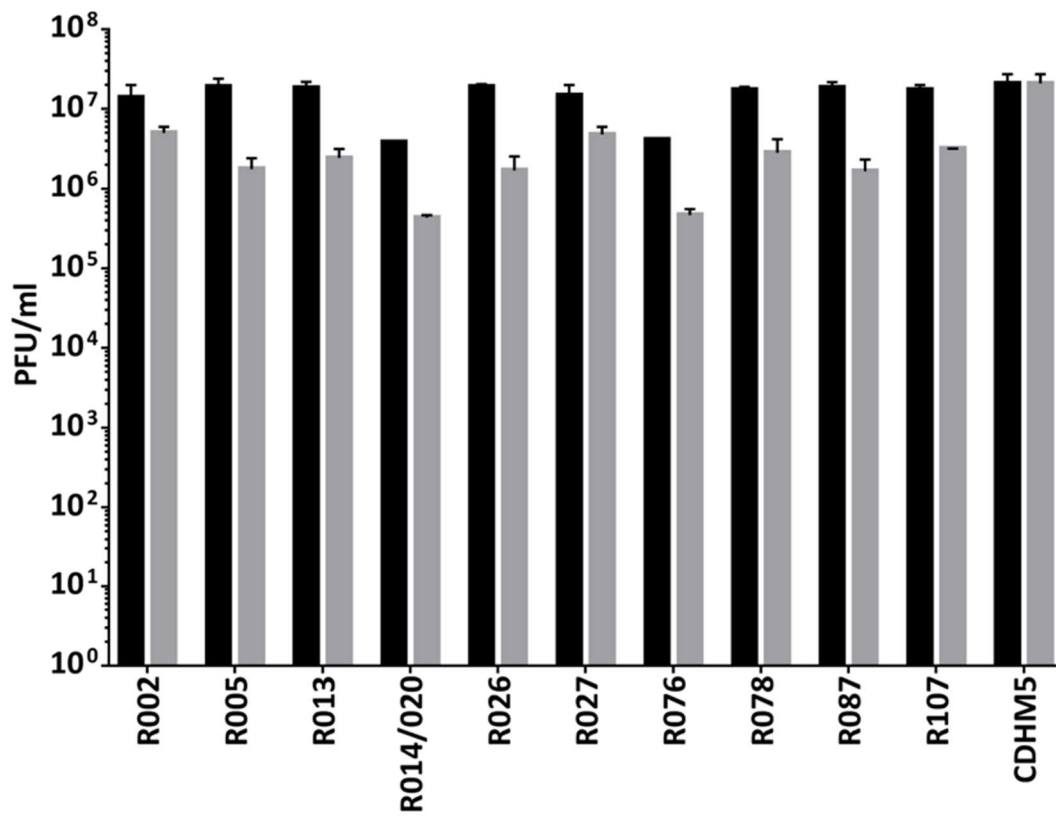

(d)

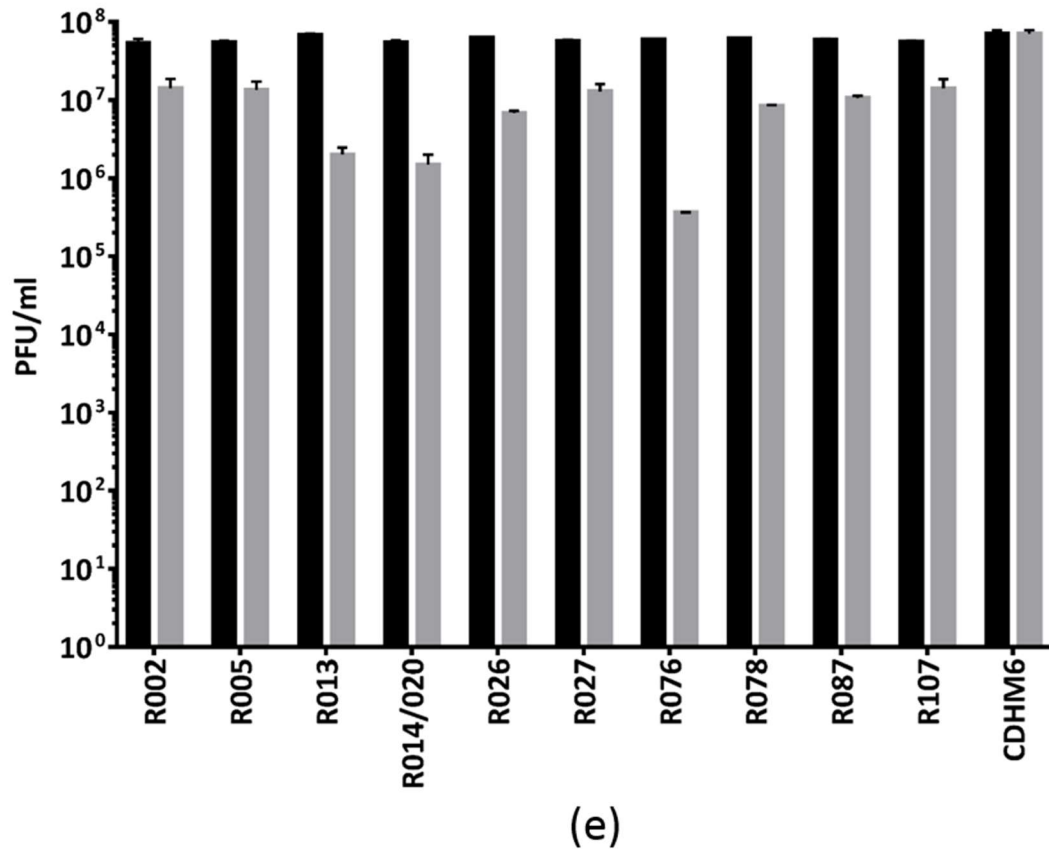

Supplementary Figure S2. Adsorption and irreversible binding of *C. difficile* phages (a) CDHM1, (b) CDHM2, (c) CDHM3, (d) CDHM5 and (e) CDHM6 to ten clinical strains of *C. difficile* that are representatives of 10 different ribotypes. Black bars represent titre of unabsorbed phages (S1) and light grey bars show titres of reversibly bound phages (S2). Both S1 and S2 values were used to calculate total adsorbed phages and irreversibly bound phages and equations used are detailed in the methods section. A phage only control in buffer was included and their phage titres are included in all graphs. All bars represent average phage titres from three independent experiments, each with three technical repeats and error bars represent standard error of the mean.
